# Supplementary material
Source: publisher site journal article supplement (https://www.dovepress.com/article/324015)
Supplement: Supplementary file 1 [file get_supplementary_file.php]

**Supplementary Tables**

**Table S1. Correlation between clinicopathological characteristics and expression of circPTCH1 in 35 lung cancer and matched normal adjacent tissue**

| **Characteristic** | **cases** | **Relative expression** | | ***p* value** |
| --- | --- | --- | --- | --- |
| **high** | **low** |
| Gender | | | | |
| male | 24 | 13 | 11 | 0.481 |
| female | 11 | 7 | 4 |
| Ages | | | | |
| ≤65 | 17 | 9 | 8 | 0.503 |
| >65 | 18 | 12 | 6 |
| Differentiation | | | | |
| well | 14 | 8 | 6 | 0.881 |
| moderate | 11 | 6 | 5 |
| poor | 10 | 5 | 5 |
| History type | | | | |
| adenocarcinoma | 15 | 9 | 6 | 0.706 |
| squamous carcinoma | 15 | 10 | 5 |
| others | 5 | 3 | 2 |
| Lymphatic metastasis | | | | |
| positive | 21 | 19 | 2 | 0.039* |
| negative | 14 | 10 | 8 |
| Distant metastasis | | | | |
| yes | 10 | 6 | 4 | 0.012* |
| no | 25 | 16 | 9 |
| TNM stage | | | | |
| Ⅰ-Ⅱ | 19 | 12 | 7 | 1.000 |
| Ⅲ-Ⅳ | 16 | 8 | 8 |
| Smoking history | | | | |
| smokers | 26 | 19 | 7 | 1.000 |
| never smokers | 9 | 6 | 3 |

** p<0.05*
